# Supplementary material
Source: PubMed Central journal article supplement (PMC3577374)

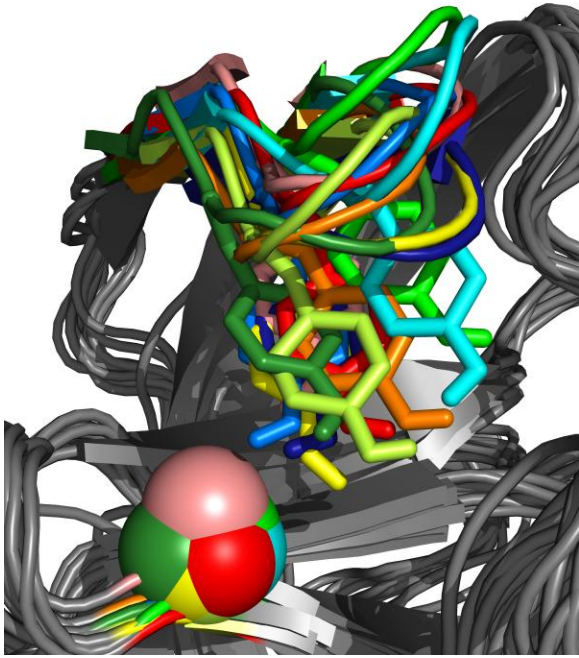

Supplement: NIHMS287677-supplement-Cover_art_nomination.pdf [file NIHMS287677-supplement-Cover_art_nomination.pdf]
